# Supplementary material for: Phase I study of enzastaurin and bevacizumab in patients with advanced cancer: safety, efficacy and pharmacokinetics
Source: PubMed Central journal article supplement (PMC3644404; doi:10.1007/s10637-012-9850-6), 2012-07-06
Supplement: 10637_2012_9850_MOESM1_ESM.pdf [file 10637_2012_9850_MOESM1_ESM.pdf]

**Online Resource 1. CTCAE Grades 3 through 5 Drug-Related Adverse Events by Dose Cohort<sup>a</sup>**

| CTCAE Term                                               | DL 1<br>n=6     | DL 2<br>n=6     | DL 3<br>n=6                 | DL 2a<br>n=6                | DL 3a<br>n=6 | DL 2b<br>n=6                | DL 3b<br>n=7 | DL 2c<br>n=8                | DL 3c<br>n=7                  | DL 2d<br>n=3                  | DL 3d<br>n=6                | Total<br>N=67    |
|----------------------------------------------------------|-----------------|-----------------|-----------------------------|-----------------------------|--------------|-----------------------------|--------------|-----------------------------|-------------------------------|-------------------------------|-----------------------------|------------------|
| <b>Laboratory, n (%)</b>                                 |                 |                 |                             |                             |              |                             |              |                             |                               |                               |                             |                  |
| Patients with ≥1 Grades 3 through 5 Laboratory CTCAE     | 0 (0.0)         | <b>1 (16.7)</b> | <b>1 (16.7)</b>             | 0 (0.0)                     | 0 (0.0)      | 0 (0.0)                     | 0 (0.0)      | 0 (0.0)                     | <b>1 (14.3)</b>               | 0 (0.0)                       | <b>1 (16.7)</b>             | <b>4 (6.0)</b>   |
| ALT/SGPT (grade 3)                                       | 0 (0.0)         | 0 (0.0)         | 0 (0.0)                     | 0 (0.0)                     | 0 (0.0)      | 0 (0.0)                     | 0 (0.0)      | 0 (0.0)                     | 0 (0.0)                       | 0 (0.0)                       | <b>1 (16.7)<sup>b</sup></b> | <b>1 (1.5)</b>   |
| AST/SGOT (grade 3)                                       | 0 (0.0)         | <b>1 (16.7)</b> | 0 (0.0)                     | 0 (0.0)                     | 0 (0.0)      | 0 (0.0)                     | 0 (0.0)      | 0 (0.0)                     | <b>1 (14.3)</b>               | 0 (0.0)                       | <b>1 (16.7)<sup>b</sup></b> | <b>3 (4.5)</b>   |
| Platelets (grade 3)                                      | 0 (0.0)         | 0 (0.0)         | <b>1 (16.7)</b>             | 0 (0.0)                     | 0 (0.0)      | 0 (0.0)                     | 0 (0.0)      | 0 (0.0)                     | 0 (0.0)                       | 0 (0.0)                       | 0 (0.0)                     | <b>1 (1.5)</b>   |
| <b>Non-Laboratory, n (%)</b>                             |                 |                 |                             |                             |              |                             |              |                             |                               |                               |                             |                  |
| Patients with ≥1 Grades 3 through 5 Non-Laboratory CTCAE | <b>1 (16.7)</b> | 0 (0.0)         | <b>3 (50.0)</b>             | <b>1 (16.7)</b>             | 0 (0.0)      | <b>2 (33.3)</b>             | 0 (0.)       | <b>4 (50.0)</b>             | <b>3 (42.9)</b>               | <b>3 (100)</b>                | <b>3 (50.0)</b>             | <b>20 (29.9)</b> |
| Anorexia (grade 3)                                       | 0 (0.0)         | 0 (0.0)         | 0 (0.0)                     | 0 (0.0)                     | 0 (0.0)      | 0 (0.0)                     | 0 (0.0)      | <b>1 (12.5)</b>             | 0 (0.0)                       | 0 (0.0)                       | 0 (0.0)                     | <b>1 (1.5)</b>   |
| Cardiac (grade 5)                                        | 0 (0.0)         | 0 (0.0)         | 0 (0.0)                     | 0 (0.0)                     | 0 (0.0)      | 0 (0.0)                     | 0 (0.0)      | 0 (0.0)                     | 0 (0.0)                       | <b>1 (33.3)<sup>b,d</sup></b> | 0 (0.0)                     | <b>1 (1.5)</b>   |
| Cardiac infarction (grade 4)                             | 0 (0.0)         | 0 (0.0)         | <b>1 (16.7)<sup>b</sup></b> | 0 (0.0)                     | 0 (0.0)      | 0 (0.0)                     | 0 (0.0)      | 0 (0.0)                     | 0 (0.0)                       | 0 (0.0)                       | 0 (0.0)                     | <b>1 (1.5)</b>   |
| Constitutional symptoms (grade 3)                        | 0 (0.0)         | 0 (0.0)         | 0 (0.0)                     | 0 (0.0)                     | 0 (0.0)      | 0 (0.0)                     | 0 (0.0)      | <b>2 (25.0)</b>             | 0 (0.0)                       | 0 (0.0)                       | 0 (0.0)                     | <b>2 (3.0)</b>   |
| Asthenia (grade 3)                                       | 0 (0.0)         | 0 (0.0)         | <b>1 (16.7)</b>             | 0 (0.0)                     | 0 (0.0)      | <b>1 (16.7)</b>             | 0 (0.0)      | <b>2 (25.0)<sup>b</sup></b> | <b>1 (14.3)</b>               | <b>3 (100.0)</b>              | <b>1 (16.7)</b>             | <b>9 (13.4)</b>  |
| Fistula, genitourinary (grade 4)                         | 0 (0.0)         | 0 (0.0)         | 0 (0.0)                     | <b>1 (16.7)<sup>b</sup></b> | 0 (0.0)      | 0 (0.0)                     | 0 (0.0)      | 0 (0.0)                     | 0 (0.0)                       | 0 (0.0)                       | 0 (0.0)                     | <b>1 (1.5)</b>   |
| Hemorrhage, CNS (grade 5)                                | 0 (0.0)         | 0 (0.0)         | 0 (0.0)                     | 0 (0.0)                     | 0 (0.0)      | <b>1 (16.7)<sup>b</sup></b> | 0 (0.0)      | 0 (0.0)                     | 0 (0.0)                       | 0 (0.0)                       | 0 (0.0)                     | <b>1 (1.5)</b>   |
| Infection with grade 3/4 neutrophils (grade 3)           | 0 (0.0)         | 0 (0.0)         | 0 (0.0)                     | 0 (0.0)                     | 0 (0.0)      | 0 (0.0)                     | 0 (0.0)      | 0 (0.0)                     | 0 (0.0)                       | 0 (0.0)                       | <b>1 (16.7)</b>             | <b>1 (1.5)</b>   |
| Infection with unknown ANC (grade 3)                     | 0 (0.0)         | 0 (0.0)         | 0 (0.0)                     | 0 (0.0)                     | 0 (0.0)      | 0 (0.0)                     | 0 (0.0)      | 0 (0.0)                     | <b>1 (14.3)<sup>b,c</sup></b> | 0 (0.0)                       | 0 (0.0)                     | <b>1 (1.5)</b>   |
| Pain (grade 3)                                           | <b>1 (16.7)</b> | 0 (0.0)         | 0 (0.0)                     | 0 (0.0)                     | 0 (0.0)      | 0 (0.0)                     | 0 (0.0)      | 0 (0.0)                     | 0 (0.0)                       | 0 (0.0)                       | 0 (0.0)                     | <b>1 (1.5)</b>   |
| Pancreatitis (grade 3)                                   | 0 (0.0)         | 0 (0.0)         | 0 (0.0)                     | 0 (0.0)                     | 0 (0.0)      | 0 (0.0)                     | 0 (0.0)      | 0 (0.0)                     | <b>1 (14.3)<sup>b</sup></b>   | 0 (0.0)                       | 0 (0.0)                     | <b>1 (1.5)</b>   |
| Prolonged QTc interval (grade 3)                         | 0 (0.0)         | 0 (0.0)         | 0 (0.0)                     | 0 (0.0)                     | 0 (0.0)      | 0 (0.0)                     | 0 (0.0)      | 0 (0.0)                     | 0 (0.0)                       | 0 (0.0)                       | <b>1 (16.7)</b>             | <b>1 (1.5)</b>   |
| Rash/desquamation (grade 3)                              | 0 (0.0)         | 0 (0.0)         | 0 (0.0)                     | 0 (0.0)                     | 0 (0.0)      | 0 (0.0)                     | 0 (0.0)      | <b>1 (12.5)</b>             | 0 (0.0)                       | 0 (0.0)                       | 0 (0.0)                     | <b>1 (1.5)</b>   |
| Somnolence (grade 4)                                     | 0 (0.0)         | 0 (0.0)         | 0 (0.0)                     | 0 (0.0)                     | 0 (0.0)      | 0 (0.0)                     | 0 (0.0)      | 0 (0.0)                     | 0 (0.0)                       | <b>1 (33.3)</b>               | 0 (0.0)                     | <b>1 (1.5)</b>   |

**Online Resource 1. CTCAE Grades 3 through 5 Drug-Related Adverse Events by Dose Cohort<sup>a</sup>**

| CTCAE Term           | DL 1<br>n=6 | DL 2<br>n=6 | DL 3<br>n=6                 | DL 2a<br>n=6 | DL 3a<br>n=6 | DL 2b<br>n=6 | DL 3b<br>n=7 | DL 2c<br>n=8 | DL 3c<br>n=7                | DL 2d<br>n=3 | DL 3d<br>n=6                | Total<br>N=67  |
|----------------------|-------------|-------------|-----------------------------|--------------|--------------|--------------|--------------|--------------|-----------------------------|--------------|-----------------------------|----------------|
| Thrombosis (grade 3) | 0 (0.0)     | 0 (0.0)     | <b>1 (16.7)<sup>b</sup></b> | 0 (0.0)      | 0 (0.0)      | 0 (0.0)      | 0 (0.0)      | 0 (0.0)      | 0 (0.0)                     | 0 (0.0)      | <b>1 (16.7)<sup>b</sup></b> | <b>2 (3.0)</b> |
| Vomiting (grade 3)   | 0 (0.0)     | 0 (0.0)     | 0 (0.0)                     | 0 (0.0)      | 0 (0.0)      | 0 (0.0)      | 0 (0.0)      | 0 (0.0)      | <b>1 (14.3)<sup>b</sup></b> | 0 (0.0)      | 0 (0.0)                     | <b>1 (1.5)</b> |

Abbreviations: ALT/SGPT, alanine transaminase/glutamic pyruvic transaminase; ANC, absolute neutrophil count; AST/SGOT, aspartate transaminase/glutamic oxaloacetic transaminase; CNS, central nervous system; CTCAE, Common Terminology Criteria for Adverse Events; SAE, serious adverse event.

<sup>a</sup> On study or within 30 days of discontinuation.

<sup>b</sup> Indicates an SAE coded using the MedDRA Version 9.0 dictionary. Other SAEs are: Dose Level 2c, failure to thrive; Dose Level 3d, pulmonary embolism.

<sup>c</sup> Postoperative wound infection.

<sup>d</sup> Ventricular tachycardia.
