# Supplementary material for: Phase I study of enzastaurin and bevacizumab in patients with advanced cancer: safety, efficacy and pharmacokinetics
Source: PubMed Central journal article supplement (PMC3644404; doi:10.1007/s10637-012-9850-6), 2012-07-06
Supplement: 10637_2012_9850_MOESM2_ESM.pdf [file 10637_2012_9850_MOESM2_ESM.pdf]

## Online Resource 2.

| MMRM Analyses of pGSK3-beta |                 |    |        |      |                       |
|-----------------------------|-----------------|----|--------|------|-----------------------|
| Dose Schedule               | Sample Number   | N  | LSMean | SE   | <i>P</i> <sup>a</sup> |
| QD                          | C1D1, 4 hrs     | 12 | 2.28   | 0.26 | .473                  |
| BID                         | C1D1, 4 hrs     | 40 | 2.08   | 0.15 |                       |
| QD                          | C1D2, 24 hrs    | 11 | 2.06   | 0.23 | .366                  |
| BID                         | C1D2, 24 hrs    | 31 | 1.84   | 0.13 |                       |
| QD                          | C2D1, pre-dose  | 7  | 1.85   | 0.26 | .384                  |
| BID                         | C2D1, pre-dose  | 27 | 1.59   | 0.15 |                       |
| QD                          | Discontinuation | 6  | 1.63   | 0.33 | .464                  |
| BID                         | Discontinuation | 14 | 1.35   | 0.20 |                       |

Abbreviations: BID, twice daily; C, cycle; D, day; LSMean, least-square mean; MMRM = mixed-model analysis of repeated measures; QD = once daily; SE = standard error.

<sup>a</sup> Between-group comparison.

Note: pGSK3-beta values are natural log transformed prior to MMRM analyses.
